# Supplementary material for: Management of Multi-Casualty Incidents in Mountain Rescue: Evidence-Based Guidelines of the International Commission for Mountain Emergency Medicine (ICAR MEDCOM)
Source: PubMed Central journal article supplement — High Alt Med Biol. 2018 Jun 1;19(2):131–40. doi: 10.1089/ham.2017.0143 (PMC6014052; doi:10.1089/ham.2017.0143), 2018-06-01
Supplement: Supp_Tables1-3.pdf [file Supp_Tables1-3.pdf]

## Supplementary Data

SUPPLEMENTARY TABLE S1. SKI LIFT ACCIDENTS IN EUROPE AND NORTH AMERICA IN CHRONOLOGICAL ORDER

| <i>Date</i> | <i>Location</i>                         | <i>Dead</i> | <i>Injured</i> | <i>Not injured</i> | <i>Involved</i> | <i>Risk factors</i> |
|-------------|-----------------------------------------|-------------|----------------|--------------------|-----------------|---------------------|
| 1956        | Rowe Mountain (NH,USA)                  | 1           | 7              | NA                 | 8               | Chairlift           |
| 1957        | Cogne (Val d'Aosta, IT)                 | 1           | 11             | NA                 | 12              | Cable car           |
| 1961        | Vallée Blanche, Chamonix (FRA)          | 6           | 0              | NA                 | 6               | Gondola             |
| 1965        | Puy de Sancy (FRA)                      | 7           | 10             | NA                 | 17              | Gondola             |
| 1966        | Chamonix (FRA)                          | 2           | 16             | NA                 | 18              | Gondola             |
| 1970        | Merano (South Tyrol, IT)                | 5           | 0              | NA                 | 5               | Gondola             |
| 1970        | Alagna (Valsesia, IT)                   | 4           | 0              | NA                 | 4               | Gondola             |
| 1972        | Bettmeralp (CH)                         | 12          | 2              | NA                 | 14              | Gondola             |
| 1972        | Les Deux Alpes (FRA)                    | 9           | 0              | NA                 | 9               | Gondola             |
| 1973        | Idaho (USA)                             | 0           | 17             | NA                 | 17              | Chairlift           |
| 1976        | Cavalese (IT)                           | 42          | 1              | NA                 | 43              | Cable car           |
| 1976        | Vail (CO, USA)                          | 4           | 5              | NA                 | 9               | Gondola             |
| 1977        | Jiminy Peak (MA, USA)                   | 0           | 11             | NA                 | 11              | Chairlift           |
| 1978        | Squaw Valley (CA, USA)                  | 4           | 32             | NA                 | 36              | Cable car           |
| 1981        | Heavenly (CA, USA)                      | 0           | 17             | NA                 | 17              | Chairlift           |
| 1983        | Champoluc, Val d'Aosta (IT)             | 11          | 0              | NA                 | 11              | Gondola             |
| 1984        | Big Powderhorn (MI, USA)                | 1           | 8              | NA                 | 9               | Chairlift           |
| 1985        | Keystone (CO, USA)                      | 0           | 49             | NA                 | 49              | Chairlift           |
| 1987        | Luz Ardiden ( Pyrénées, FRA)            | 6           | 87             | NA                 | 93              | Chairlift           |
| 1989        | Vaujany (FRA)                           | 8           | 0              | NA                 | 8               | Cable car           |
| 1992        | Nassfeld (Carinthia, AUT)               | 4           | 9              | NA                 | 13              | Chairlift           |
| 1995        | Whistler (BC, CAN)                      | 2           | 10             | NA                 | 12              | Chairlift           |
| 1996        | Riederalp (CH)                          | 1           | 18             | NA                 | 19              | Gondola             |
| 1998        | Cavalese (Trentino, IT)                 | 20          | 0              | NA                 | 20              | Cable car           |
| 1999        | Pic de Bure, Dévoluy (FRA)              | 20          | 0              | NA                 | 20              | Cable car           |
| 1999        | Crans Montana (CH)                      | 1           | 4              | NA                 | 5               | Gondola             |
| 2000        | Oberstdorf (DE)                         | 0           | 32             | NA                 | 32              | Gondola             |
| 2000        | Kaprun (Salzburg, AUT)                  | 155         | 0              | NA                 | 155             | Cable car           |
| 2005        | Sölden (Tyrol, AUT)                     | 9           | 10             | NA                 | 19              | Gondola             |
| 2007        | Lower Austria (AUT)                     | 0           | 0              | 22                 | 22              | Chairlift           |
| 2008        | Blackcomb (BC, CAN)                     | 0           | 10             | NA                 | 10              | Gondola             |
| 2009        | Devil's head (WI, USA)                  | 0           | 14             | NA                 | 14              | Chairlift           |
| 2011        | Upper Austria (AUT)                     | 0           | 0              | 84                 | 84              | NA                  |
| 2011        | Upper Austria (AUT)                     | 0           | 0              | 69                 | 69              | NA                  |
| 2012        | S <sup>t</sup> François Longchamp (FRA) | 0           | 0              | 70                 | 70              | Chairlift           |
| 2014        | Styria (AUT)                            | 0           | 0              | 23                 | 23              | NA                  |
| 2016        | Upper Austria (AUT)                     | 0           | 0              | 11                 | 11              | NA                  |
| 2016        | Chamonix (FRA)                          | 0           | 0              | 33                 | 33              | Gondola             |
| Total       |                                         | 335         | 380            | 312                | 1027            |                     |

AUT, Austria; BC, British Columbia; CA, California; CO, Colorado; CAN, Canada; CH, Switzerland; DE, Germany; FRA, France; ID, Idaho; IT, Italy; USA, United States of America; MA, Massachusetts; MI, Michigan; MT, Montana; NA, not available; NH, New Hampshire; WI, Wisconsin.

SUPPLEMENTARY TABLE S2. AVALANCHE MULTI-CASUALTY INCIDENTS IN DEVELOPING COUNTRIES

| <i>Year</i> | <i>Location</i>                              | <i>Dead</i> | <i>Injured</i> | <i>Involved</i> | <i>Activity</i>     |
|-------------|----------------------------------------------|-------------|----------------|-----------------|---------------------|
| 1964        | Aiguille Verte (FRA)                         | 14          | 0              | 14              | Mountaineering      |
| 1974        | Mont Blanc du Tacul (FRA)                    | 8           | 0              | 8               | Mountaineering      |
| 1976        | La Mongie (FRA)                              | 7           | 8              | 15              | Downhill skiing     |
| 1978        | Chamonix-Mont Blanc petit plateau (FRA)      | 1           | 3              | 6               | Ski touring         |
| 1981        | Bonneval-sur-Arc (FRA)                       | 9           | 0              | 9               | Ski touring         |
| 1982        | Grand Galbert (FRA)                          | 2           | 0              | 5               | Ski touring         |
| 1982        | Bonneval sur Arc (FRA)                       | 5           | 0              | 5               | Ski touring         |
| 1991        | Pic de Malrif (FRA)                          | 9           | 0              | 9               | Ski touring         |
| 1992        | Val Thorens (FRA)                            | 7           | 3              | 10              | Downhill skiing     |
| 1994        | Col du Palais (FRA)                          | 6           | 0              | 7               | Freeride skiing     |
| 1996        | Petite Sciammarella (FRA)                    | 4           | 7              | 14              | Mountaineering      |
| 1996        | Alpe d'Huez (FRA)                            | 1           | 1              | 10              | Downhill skiing     |
| 1997        | Innertkirche-Steintälli/Jochpass (CH)        | 3           | 0              | 6               | NA                  |
| 1997        | Disentis-Piz Gendusas (CH)                   | 1           | 0              | 5               | NA                  |
| 1998        | Crête du Lauzet (FRA)                        | 11          | 20             | 32              | Snowshoers          |
| 1998        | Kokanee Glacier Provincial Park (BC, Canada) | 1           | 0              | 6               | Ski touring         |
| 1999        | Lavin-Gonda, Piz Chapisun-Inn (CH)           | 1           | 0              | 4               | NA                  |
| 1999        | Bourg-Saint-Pierre-L'Hospitalet (CH)         | 1           | 0              | 17              | NA                  |
| 1999        | Turnagain Pass (AK, USA)                     | 6           | 3              | 10              | Snowmobile          |
| 1999        | Cumberland Pass (CO, USA)                    | 3           |                | 4               | Ski touring         |
| 1999        | Talkeetna (AK, USA)                          | 1           | 3              | 7               | Snowmobile          |
| 1999        | Grouse mountain (BC, Canada)                 | 1           | 4              | 5               | Hiking              |
| 1999        | Roger Pass (BC, Canada)                      | 1           | 4              | 5               | Ski touring country |
| 2000        | Davos-Mittelgrat, Meierhofer Tälli (CH)      | 3           | 0              | 6               | NA                  |
| 2000        | Prapic (FRA)                                 | 6           | 0              | 6               | Ski touring         |
| 2000        | Wright Peak (NY, USA)                        | 1           | 5              | 6               | Ski touring         |
| 2000        | Snowbasin (UT, USA)                          | 0           | 3              | 5               | Downhill skiing     |
| 2000        | Absaroka Range (MT, USA)                     | 2           | 1              | 4               | Hiking              |
| 2001        | Trient-Tête de Balme (CH)                    | 2           | 0              | 5               | NA                  |
| 2001        | Ayer-Plat de la Lé (Zinal, CH)               | 1           | 0              | 8               | NA                  |
| 2001        | Park City (UT, USA)                          | 1           | 0              | 4               | Ski touring         |
| 2001        | Thunder Meadows (BC, Canada)                 | 2           | 2              | 13              | Freeride skiing     |
| 2001        | Monashee (BC, Canada)                        | 1           | 3              | 4               | Freeride skiing     |
| 2001        | Roger Pass (BC, Canada)                      | 1           | 0              | 4               | Freeride skiing     |
| 2001        | Big White Mountain (BC, Canada)              | 0           | 0              | 5               | Snowboarding        |
| 2001        | Wild Horse Creek (BC, Canada)                | 1           | 1              | 5               | Snowmobile          |
| 2002        | Scuol-Piz Vallatscha (Graubünden, CH)        | 1           | 0              | 5               | NA                  |
| 2002        | Val-d'Isère (FRA)                            | 6           | 0              | 6               | Freeride skiing     |
| 2002        | Sheep Mountain (MT, USA)                     | 4           | 0              | 5               | Snowmobile          |
| 2002        | Ashcroft (CO, USA)                           | 1           | 2              | 5               | Ski touring         |
| 2002        | Tuckerman Ravine (NH, USA)                   | 2           | 0              | 7               | Mountaineering      |
| 2002        | Norse Peak (WA, USA)                         | 1           | 6              | 7               | Ski touring         |
| 2002        | Revelstroke (BC, Canada)                     | 2           | 2              | 4               | Freeride skiing     |
| 2003        | Orsières-La Broya (Champex, CH)              | 2           | 0              | 5               | NA                  |
| 2003        | Echo Bowl (ID, USA)                          | 1           | 0              | 5               | Snowmobile          |
| 2003        | Mt. Timpanogos (UT, USA)                     | 3           | 2              | 5               | Ski touring         |
| 2003        | Mont Cheops (BC, Canada)                     | 7           | 0              | 17              | Ski touring         |
| 2003        | Durand Glacier (BC, Canada)                  | 7           | 1              | 11              | Ski touring         |
| 2003        | Fernie (BC, Canada)                          | 3           | 0              | 7               | Snowmobile          |
| 2003        | Meadow Mountain (BC, Canada)                 | 0           | 3              | 14              | Snowmobile          |
| 2003        | Brewer Creek (BC, Canada)                    | 1           | 0              | 12              | Snowmobile          |
| 2004        | Bagnes-Mont Rogneux (CH)                     | 2           | 0              | 4               | NA                  |
| 2004        | Russel Bowl (BC, Canada)                     | 1           | 2              | 14              | Snowboarding        |
| 2005        | Pic de Bure (FRA)                            | 3           | 4              | 7               | Ski touring         |
| 2006        | Tyrol (AUT)                                  | 0           | 0              | 6               | Freeride skiing     |
| 2006        | Vorarlberg (AUT)                             | 0           | 1              | 5               | Freeride skiing     |
| 2006        | Tyrol (AUT)                                  | 1           | 2              | 8               | Ski touring         |
| 2006        | Salzburg (AUT)                               | 0           | 0              | 17              | Downhill skiing     |
| 2006        | Tyrol (AUT)                                  | 0           | 0              | 6               | Freeride skiing     |
| 2006        | Trap Peak (CO, USA)                          | 2           | 0              | 7               | Snowmobile          |
| 2007        | Salzburg (AUT)                               | 0           | 4              | 5               | Freeride skiing     |
| 2007        | Tyrol (AUT)                                  | 0           | 2              | 5               | Freeride skiing     |
| 2007        | Tyrol (AUT)                                  | 0           | 0              | 8               | Ski touring         |
| 2007        | Tyrol (AUT)                                  | 0           | 0              | 6               | Ski touring         |
| 2007        | Tyrol (AUT)                                  | 0           | 0              | 5               | Downhill skiing     |
| 2007        | The Canyons (UT, USA)                        | 1           | 1              | 4               | Downhill skiing     |

(continued)

SUPPLEMENTARY TABLE S2. (CONTINUED)

| <i>Year</i> | <i>Location</i>                           | <i>Dead</i> | <i>Injured</i> | <i>Involved</i> | <i>Activity</i> |
|-------------|-------------------------------------------|-------------|----------------|-----------------|-----------------|
| 2007        | Delta Peak (BC, CANADA)                   | 2           | 3              | 5               | Freeride skiing |
| 2008        | Uløya (NO)                                | 1           | 0              | 4               | Ski touring     |
| 2008        | Tyrol (AUT)                               | 0           | 2              | 26              | Hiking          |
| 2008        | Tyrol (AUT)                               | 0           | 0              | 5               | Freeride skiing |
| 2008        | Mont Blanc du Tacul (FRA)                 | 8           | 0              | 32              | Mountaineering  |
| 2008        | Mount Baker (WA, USA)                     | 2           | 1              | 5               | Snowmobile      |
| 2008        | Turnagain Pass (AK, USA)                  | 2           | 0              | 4               | Snowmobile      |
| 2008        | Sheep Mountain (ID, USA)                  | 1           | 0              | 4               | Snowmobile      |
| 2009        | Steiermark (AUT)                          | 2           | 1              | 6               | Ski touring     |
| 2009        | Tyrol (AUT)                               | 0           | 0              | 6               | Ski touring     |
| 2009        | Tyrol (AUT)                               | 0           | 0              | 5               | Ski touring     |
| 2009        | Col des Marches (FRA)                     | 4           | 3              | 7               | Ski touring     |
| 2009        | Pointe de la Joanne (FRA)                 | 3           | 0              | 13              | Ski touring     |
| 2009        | Indian Peak (WY, USA)                     | 3           | 0              | 4               | Snowmobile      |
| 2009        | Chetwynd (BC, Canada)                     | 1           | 0              | 9               | Snowmobile      |
| 2010        | Vefsn (NO)                                | 4           | 2              | 6               | Ski touring     |
| 2010        | Styria (AUT)                              | 0           | 0              | 11              | Freeride skiing |
| 2010        | Vorarlberg (AUT)                          | 0           | 0              | 5               | Freeride skiing |
| 2010        | Vorarlberg (AUT)                          | 2           | 0              | 12              | Freeride skiing |
| 2010        | Mount Rainier (WA, USA)                   | 1           | 0              | 11              | Mountaineering  |
| 2011        | Eikedalen (NO)                            | 2           | 3              | 5               | Freeride skiing |
| 2011        | Tyrol (AUT)                               | 0           | 0              | 5               | Ski touring     |
| 2011        | Bourg Saint Pierre-Combe de Valsorey (CH) | 5           | 6              | 11              | Snowshoers      |
| 2011        | Val-d'Isère (FRA)                         | 4           | 0              | 7               | Snowboarding    |
| 2012        | Sorbmeigaisa (NO)                         | 5           | 0              | 6               | Ski touring     |
| 2012        | Salzburg (AUT)                            | 0           | 0              | 14              | Mountaineering  |
| 2012        | Tyrol (AUT)                               | 0           | 2              | 10              | Downhill skiing |
| 2012        | Styria (AUT)                              | 0           | 0              | 8               | Ski touring     |
| 2012        | Tyrol (AUT)                               | 0           | 0              | 6               | Ski touring     |
| 2012        | Stevens Pass (WA, USA)                    | 3           | 0              | 5               | Ski touring     |
| 2012        | Denali (AK, USA)                          | 4           | 1              | 5               | Mountaineering  |
| 2013        | Hammarskaftet (Lofoten, NO)               | 0           | 4              | 11              | Ski touring     |
| 2013        | Hemsedal (NO)                             | 0           | 6              | 6               | Mountaineering  |
| 2013        | La Dent Parrachée (FRA)                   | 3           | 3              | 9               | Ski touring     |
| 2013        | Mount Washington (NH, USA)                | 0           | 3              | 12              | Mountaineering  |
| 2013        | Takhinsha Mountains (AK, USA)             | 1           | 3              | 4               | Ski touring     |
| 2013        | Loveland Pass (CO, USA)                   | 5           | 0              | 6               | Ski touring     |
| 2014        | Sunnmøre (NO)                             | 4           | 0              | 4               | Ski touring     |
| 2014        | Carinthia (AUT)                           | 0           | 0              | 7               | Ski touring     |
| 2014        | Vail (CO, USA)                            | 1           | 3              | 4               | Ski touring     |
| 2014        | Wallowa Mountains (OR, USA)               | 2           | 2              | 5               | Ski touring     |
| 2014        | Sawatch Range (CO, USA)                   | 2           | 3              | 5               | Ski touring     |
| 2014        | Smoky Mountains (ID, USA)                 | 1           | 0              | 4               | Snowmobile      |
| 2014        | Mount Rainier (WA, USA)                   | 6           | 0              | 6               | Mountaineering  |
| 2014        | La Combe à Marion (FRA)                   | 0           | 5              | 10              | Ski touring     |
| 2014        | Roc des Saints Pères (FRA)                | 0           | 4              | 4               | Ski touring     |
| 2015        | Tyrol (AUT)                               | 0           | 4              | 7               | Freeride skiing |
| 2015        | Tyrol (AUT)                               | 0           | 0              | 5               | Freeride skiing |
| 2015        | Carinthia (AUT)                           | 0           | 0              | 12              | Freeride skiing |
| 2015        | Carinthia (AUT)                           | 0           | 0              | 5               | Mountaineering  |
| 2015        | Col Emile Pic (FRA)                       | 3           | 1              | 12              | Ski touring     |
| 2015        | Vallon de Bachas (FRA)                    | 6           | NA             | 6               | Ski touring     |
| 2015        | Barre des Ecrins (FRA)                    | 7           | 1              | 8               | Mountaineering  |
| 2016        | Valle Aurina-Ahrntal (IT)                 | 6           | NA             | 10              | Ski touring     |
| 2016        | Le petit Argentier-Modane (FRA)           | 6           | 27             | 52              | Ski touring     |
| 2016        | Les Deux Alpes (FRA)                      | 3           | 1              | 13              | Downhill skiing |
| 2017        | Tignes (FRA)                              | 4           | 0              | 4               | Freeride skiing |
| 2017        | Jochgrubenkopf (AUT)                      | 4           | NA             | 8               | Ski touring     |
| 2017        | Obergurgl (AUT)                           | 2           | 1              | 10              | Ski touring     |
| 2017        | Wattental (AUT)                           | 5           | NA             | 17              | Ski touring     |
| 2017        | Nasu (JP)                                 | 8           | 30             | 63              | Mountaineering  |
| Total       |                                           | 313         | 228            | 1101            |                 |

AK, Alaska; CO Colorado; Freeride skiing, downhill skiing outside of ski slopes; ID, Idaho; JP, Japan; MT, Montana; NO, Norway; NY, New York state; UT, Utah; WA, Washington state; WY, Wyoming.

SUPPLEMENTARY TABLE S3. AVALANCHES ON TOURISTIC HABITATIONS IN DEVELOPING COUNTRIES

| <i>Year</i> | <i>Location</i>                         | <i>Dead</i> | <i>Injured</i> | <i>Involved</i> |
|-------------|-----------------------------------------|-------------|----------------|-----------------|
| 1970        | Val-d'Isère (FRA)                       | 39          | NA             | 39              |
| 1970        | Plateau d'Assy (FRA)                    | 74          | NA             | 74              |
| 1970        | Lanslevillard (FRA)                     | 8           | NA             | 9               |
| 1974        | North Route Café Motorhead (BC, Canada) | 7           | NA             | 7               |
| 1978        | Le Tour–Chamonix (FRA)                  | 5           | NA             | 5               |
| 1999        | Evolène-Le Breguet (CH)                 | 12          | NA             | 12              |
| 1999        | Montroc–Chamonix (FRA)                  | 12          | NA             | 13              |
| 1999        | Galtür (AUT)                            | 31          | NA             | 31              |
| 1999        | Valzür (AUT)                            | 8           | NA             | 8               |
| 1999        | Kangiqsualujjuaq (QC, Canada)           | 9           | 25             | 500             |
| 2017        | Rigopiano Farindola (IT)                | 29          | NA             | 40              |
| Total       |                                         | 234         | 25             | 738             |

QC, Québec.
